# Supplementary material for: Multiplicity and Diversity of Plasmodium vivax Infections in a Highly Endemic Region in Papua New Guinea
Source: PLOS journal article supplement (doi:10.1371/journal.pntd.0001424), 2011-12-20
Supplement: S1 (10.1371/journal.pntd.0001424.s001) [file journal.pntd.0001424.s001]

**Table S1: Genotyping results from 1162 *P. vivax* positive field samples using the markers *msp1F3* and MS16.**

|                                                                  | MOI as determined by <i>msp1F3</i> | MOI as determined by MS16 | MOI combined from both markers | MOI identical by both markers |
|------------------------------------------------------------------|------------------------------------|---------------------------|--------------------------------|-------------------------------|
| MOI=1                                                            | 404                                | 439                       | 305                            | 230                           |
| MOI=2                                                            | 291                                | 295                       | 305                            | 95                            |
| MOI=3                                                            | 208                                | 181                       | 235                            | 50                            |
| MOI=4                                                            | 118                                | 107                       | 166                            | 18                            |
| MOI=5                                                            | 50                                 | 49                        | 89                             | 0                             |
| MOI=6                                                            | 16                                 | 32                        | 40                             | 4                             |
| MOI=7                                                            | 5                                  | 15                        | 20                             | 0                             |
| MOI=8                                                            | 1                                  | 0                         | 1                              | 0                             |
| MOI=9                                                            | 1                                  | 0                         | 1                              | 0                             |
| Sample negative for one marker and positive for the other marker | 67                                 | 19                        | 0                              |                               |
| Sample excluded because of PCR artifacts                         | 1                                  | 25                        | 0                              |                               |
| Total number of samples                                          | 1162                               | 1162                      | 1162                           | 397                           |
| Total number of multiclonal infections                           | 690<br>(63.1%)**                   | 679<br>(60.7%)**          | 857<br>(73.6%)**               |                               |
| Total number of single clone infections                          | 404<br>(36.9%)**                   | 439<br>(39.3%)**          | 305<br>(26.2%)**               | 230                           |

\* If values from both markers were discrepant, the higher value was accepted

\*\* Not taking into account samples negative for this marker and samples excluded because of PCR artifacts
